# Supplementary material for: Nearly one-fold enhancement in photoluminescence quantum yield for isostructural zero-dimensional hybrid antimony(iii) bromides by supramolecular interaction adjustments
Source: Royal Society of Chemistry journal article supplement (doi:10.1039/d1dt04374a), 2022-01-01
Supplement: d1dt04374a1.pdf [file d1dt04374a1.pdf]

Supporting Information for

**Nearly one-fold enhancement in photoluminescence quantum  
yield for isostructural zero-dimensional hybrid antimony(III)  
bromides by supramolecular interactions adjustment**

Ying-Chen Peng,<sup>a,c</sup> Sheng-Hua Zhou,<sup>a,c</sup> Jian-Ce Jin,<sup>a,c</sup> Qi Gu,<sup>a,c</sup> Ting-Hui Zhuang,<sup>a</sup> Liao-Kuo Gong,<sup>a</sup>  
Ze-Ping Wang,<sup>a</sup> Ke-Zhao Du,<sup>b\*</sup> Xiao-Ying Huang<sup>a,c\*</sup>

<sup>a</sup> State Key Laboratory of Structure Chemistry, Fujian Institute of Research on the Structure of Matter, Chinese Academy of Sciences, Fuzhou 350002, China.

<sup>b</sup> College of Chemistry and Materials Science, Fujian Provincial Key Laboratory of Polymer Materials, Fujian Normal University, 32 Shangsang Road, Fuzhou 350007, China.

<sup>c</sup> University of Chinese Academy of Sciences, Beijing, 100049, China.

**Table S1.** Crystal data and structure refinement for [EtPPh<sub>3</sub>]<sub>2</sub>[SbBr<sub>5</sub>]·EtOH (**1·EtOH-Br**) at 293 K and [EtPPh<sub>3</sub>]<sub>2</sub>[SbBr<sub>5</sub>]·MeCN (**1·MeCN-Br**) at 295 K.

|                                                      | <b>1·EtOH-Br</b>                                                   | <b>1·MeCN-Br</b>                                                   |
|------------------------------------------------------|--------------------------------------------------------------------|--------------------------------------------------------------------|
| CCDC number                                          | 218160                                                             | 218161                                                             |
| Empirical formula                                    | C <sub>42</sub> H <sub>46</sub> Br <sub>5</sub> OP <sub>2</sub> Sb | C <sub>42</sub> H <sub>43</sub> Br <sub>5</sub> NP <sub>2</sub> Sb |
| Formula weight                                       | 1150.03                                                            | 1145.01                                                            |
| Temperature/K                                        | 293(2)                                                             | 295(2)                                                             |
| Wavelength/Å                                         | 0.71073                                                            | 0.71073                                                            |
| Crystal system                                       | Monoclinic                                                         | Monoclinic                                                         |
| Space group                                          | <i>C2/c</i>                                                        | <i>C2/c</i>                                                        |
| <i>a</i> /Å                                          | 22.569(2)                                                          | 22.833(2)                                                          |
| <i>b</i> /Å                                          | 16.6933(16)                                                        | 16.9477(14)                                                        |
| <i>c</i> /Å                                          | 13.6310(12)                                                        | 13.4634(12)                                                        |
| <i>α</i> /°                                          | 90                                                                 | 90                                                                 |
| <i>β</i> /°                                          | 120.949(8)                                                         | 121.633(8)                                                         |
| <i>γ</i> /°                                          | 90                                                                 | 90                                                                 |
| Volume/Å <sup>3</sup>                                | 4404.4(8)                                                          | 4435.9(7)                                                          |
| <i>Z</i>                                             | 4                                                                  | 4                                                                  |
| $\rho_{\text{calc}}$ g/cm <sup>3</sup>               | 1.734                                                              | 1.715                                                              |
| Absorption coefficient/mm <sup>-1</sup>              | 5.266                                                              | 5.227                                                              |
| <i>F</i> (000)                                       | 2248                                                               | 2232                                                               |
| Crystal size/mm <sup>3</sup>                         | 0.600×0.400×0.400                                                  | 0.200×0.180×0.150                                                  |
| Theta range for data collection /°                   | 2.440-29.783                                                       | 2.095-29.815                                                       |
| Limiting indices                                     | -31≤ <i>h</i> ≤28, -23≤ <i>k</i> ≤19, -18≤ <i>l</i> ≤17            | -29≤ <i>h</i> ≤31, -23≤ <i>k</i> ≤23, -16≤ <i>l</i> ≤17            |
| Reflections collected/ unique                        | 12260/5226 [R <sub>int</sub> = 0.0473]                             | 25127/5748 [R <sub>int</sub> = 0.0523]                             |
| Completeness to theta                                | 25.242, 99.9 %                                                     | 25.242, 100.0 %                                                    |
| Absorption correction                                | Semi-empirical from equivalents                                    | Semi-empirical from equivalents                                    |
| Max. transmission                                    | 1.00000                                                            | 1.00000                                                            |
| Min. transmission                                    | 0.27236                                                            | 0.19319                                                            |
| Refinement method                                    | Full-matrix least-squares on <i>F</i> <sup>2</sup>                 | Full-matrix least-squares on <i>F</i> <sup>2</sup>                 |
| Data/restraints/parameters                           | 5226/2/248                                                         | 5748/0/247                                                         |
| Goodness-of-fit on <i>F</i> <sup>2</sup>             | 1.004                                                              | 1.015                                                              |
| Final <i>R</i> indexes [ <i>I</i> ≥ 2σ ( <i>I</i> )] | <i>R</i> <sub>1</sub> = 0.0435, <i>wR</i> <sub>2</sub> = 0.0769    | <i>R</i> <sub>1</sub> = 0.0367, <i>wR</i> <sub>2</sub> = 0.0679    |
| Final <i>R</i> indexes [all data]                    | <i>R</i> <sub>1</sub> = 0.0776, <i>wR</i> <sub>2</sub> = 0.0903    | <i>R</i> <sub>1</sub> = 0.0866, <i>wR</i> <sub>2</sub> = 0.0845    |
| Extinction coefficient                               | 0.00106(5)                                                         | n/a                                                                |
| Largest diff. peak and hole/e Å <sup>-3</sup>        | 0.769/-0.914                                                       | 0.614/-0.789                                                       |

[a]  $R_1 = \sum \|F_o\| - \|F_c\| / \sum \|F_o\|$ , [b]  $wR_2 = [\sum w(F_o^2 - F_c^2)^2 / \sum w(F_o^2)^2]^{1/2}$

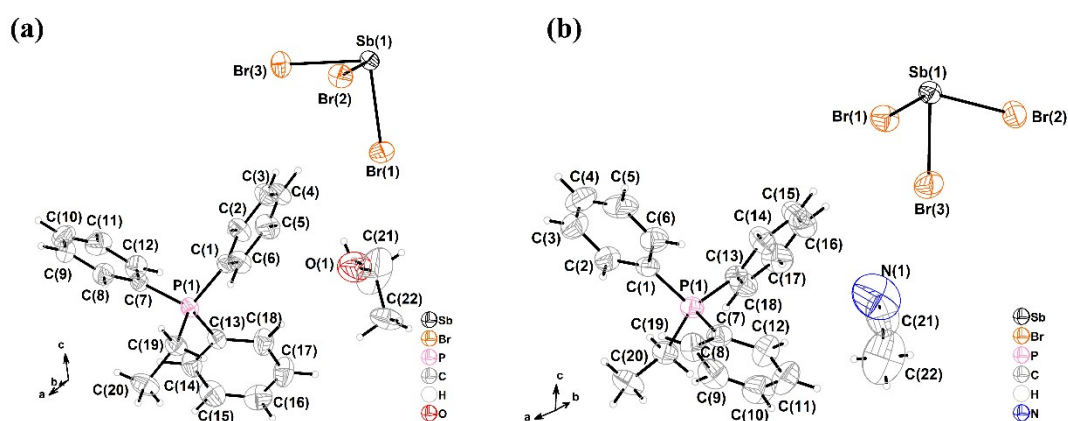

**Figure S1.** ORTEP drawings (50% ellipsoid probability) of the asymmetric units of [EtPPh<sub>3</sub>]<sub>2</sub>[SbBr<sub>5</sub>]·EtOH (**1·EtOH-Br**) at 293 K (a) and [EtPPh<sub>3</sub>]<sub>2</sub>[SbBr<sub>5</sub>]·MeCN (**1·MeCN-Br**) at 295 K (b).

**Table S2.** Selected bond lengths (Å) and bond angles (°) for [EtPPh<sub>3</sub>]<sub>2</sub>[SbBr<sub>5</sub>]·EtOH (**1·EtOH-Br**) at 293 K and [EtPPh<sub>3</sub>]<sub>2</sub>[SbBr<sub>5</sub>]·MeCN (**1·MeCN-Br**) at 295 K.

| <b>1·EtOH-Br</b>      |            | <b>1·MeCN-Br</b>      |            |
|-----------------------|------------|-----------------------|------------|
| Sb(1)-Br(1)           | 2.5174(8)  | Sb(1)-Br(1)           | 2.5196(7)  |
| Sb(1)-Br(3)#1         | 2.7716(5)  | Sb(1)-Br(3)           | 2.7643(5)  |
| Sb(1)-Br(3)           | 2.7717(5)  | Sb(1)-Br(3)#1         | 2.7644(5)  |
| Sb(1)-Br(2)           | 2.7769(5)  | Sb(1)-Br(2)#1         | 2.7753(5)  |
| Sb(1)-Br(2)#1         | 2.7770(5)  | Sb(1)-Br(2)           | 2.7754(5)  |
|                       |            |                       |            |
| Br(1)-Sb(1)-Br(3)#1   | 91.620(13) | Br(1)-Sb(1)-Br(3)     | 90.797(12) |
| Br(1)-Sb(1)-Br(3)     | 91.619(13) | Br(1)-Sb(1)-Br(3)#1   | 90.797(12) |
| Br(3)#1-Sb(1)-Br(3)   | 176.76(3)  | Br(3)-Sb(1)-Br(3)#1   | 178.41(2)  |
| Br(1)-Sb(1)-Br(2)     | 88.363(12) | Br(1)-Sb(1)-Br(2)#1   | 89.004(11) |
| Br(3)#1-Sb(1)-Br(2)   | 91.329(17) | Br(3)-Sb(1)-Br(2)#1   | 91.453(16) |
| Br(3)-Sb(1)-Br(2)     | 88.764(17) | Br(3)#1-Sb(1)-Br(2)#1 | 88.576(16) |
| Br(1)-Sb(1)-Br(2)#1   | 88.362(12) | Br(1)-Sb(1)-Br(2)     | 89.003(11) |
| Br(3)#1-Sb(1)-Br(2)#1 | 88.764(17) | Br(3)-Sb(1)-Br(2)     | 88.575(16) |
| Br(3)-Sb(1)-Br(2)#1   | 91.328(17) | Br(3)#1-Sb(1)-Br(2)   | 91.451(17) |
| Br(2)-Sb(1)-Br(2)#1   | 176.73(2)  | Br(2)#1-Sb(1)-Br(2)   | 178.01(2)  |

Symmetry transformations used to generate equivalent atoms: #1 -x+1, y, -z+3/2

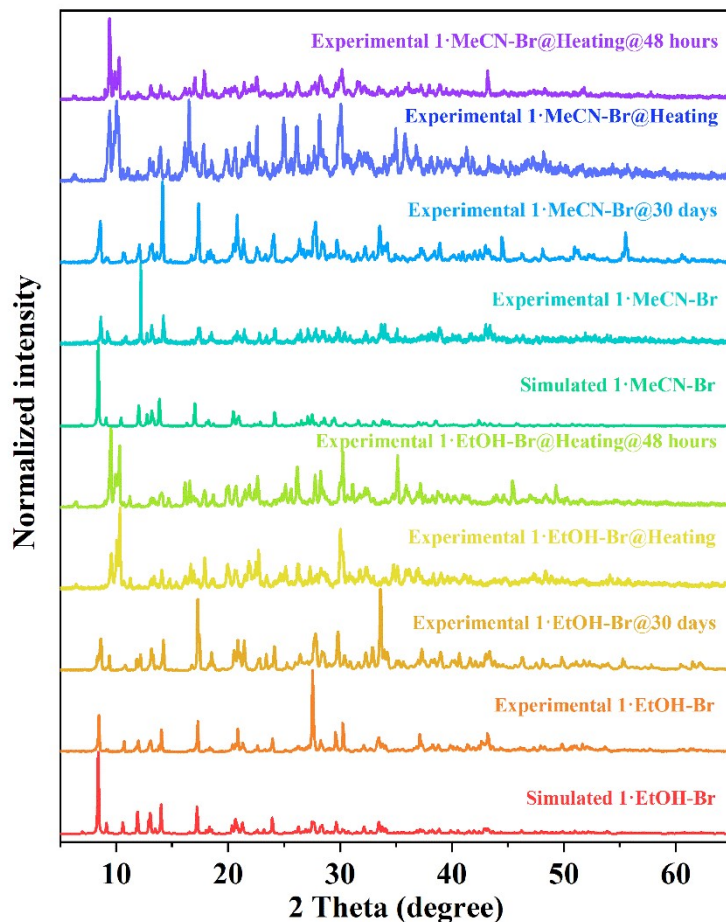

**Figure S2.** Simulated and experimental (including freshly prepared samples, samples staying for 30 days, samples after heating for desolvation and solvent-loss samples after staying for 48 hours) PXRD patterns of  $1 \cdot \text{EtOH-Br}$  and  $1 \cdot \text{MeCN-Br}$  at RT.

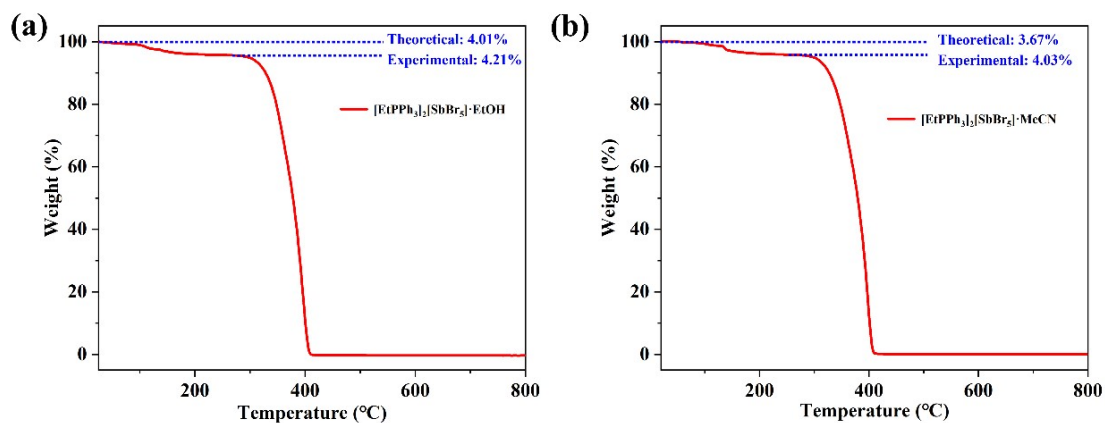

**Figure S3.** TG curves of  $1 \cdot \text{EtOH-Br}$  (a) and  $1 \cdot \text{MeCN-Br}$  (b).

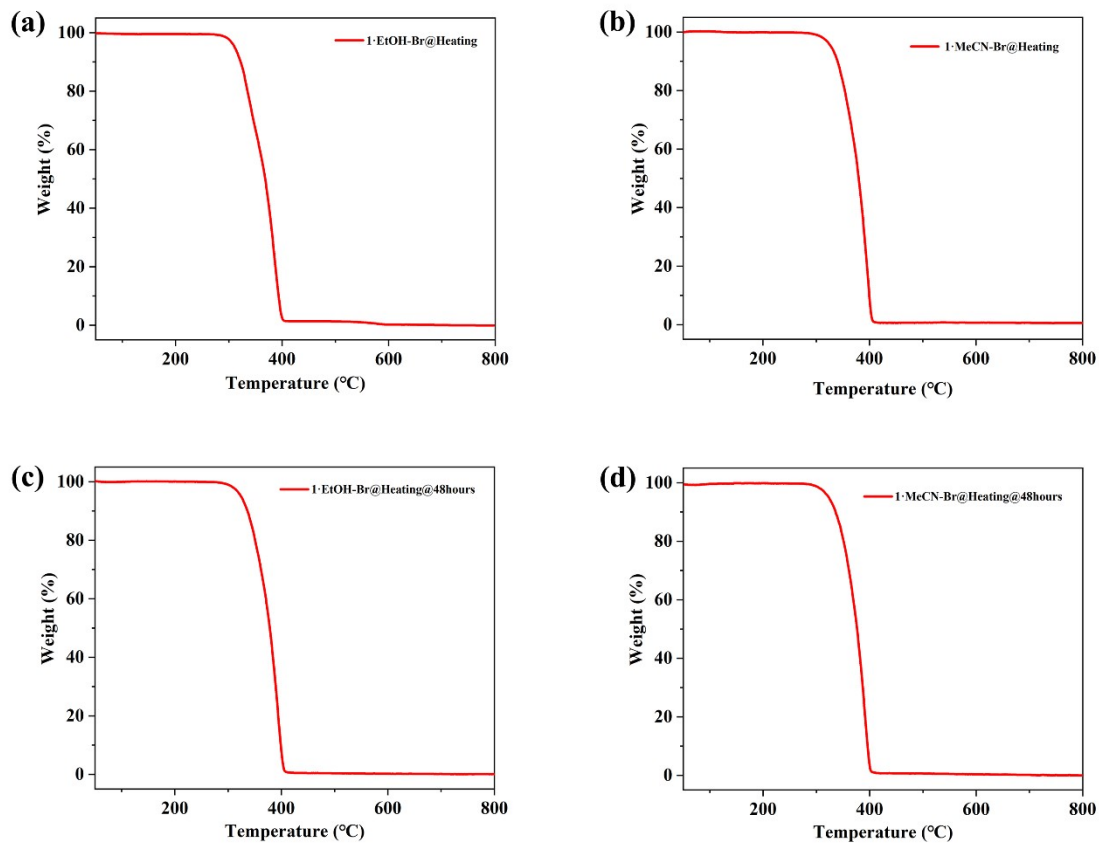

**Figure S4.** TG curves of **1-Br** from heating **1·EtOH-Br** (a) and **1·MeCN-Br** (b). TG curves for the **1-Br** samples from heating **1·EtOH-Br** (c) and **1·MeCN-Br** (d) being re-tested after 48 hours in ventilation closet.

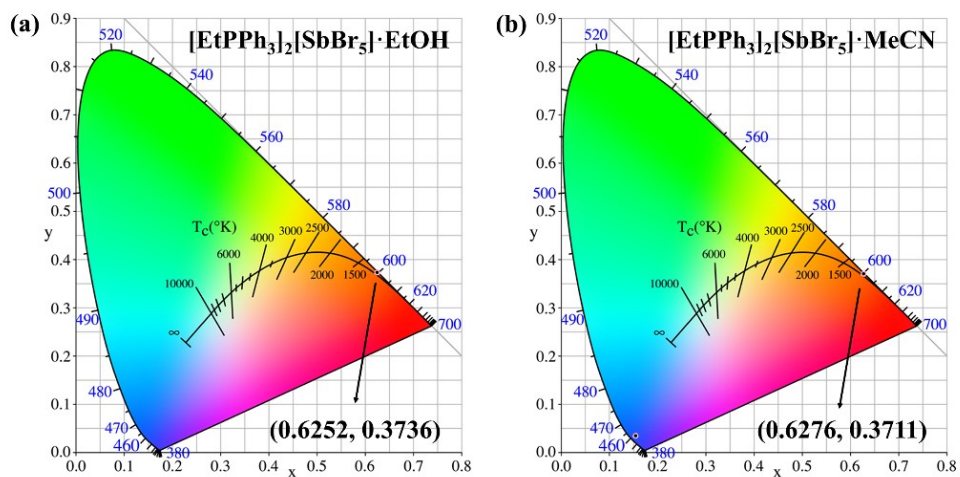

**Figure S5.** The Commission Internationale de l'Eclairage (CIE) (1931) chromaticity coordinates of **1·EtOH-Br** (a) and **1·MeCN-Br** (b).

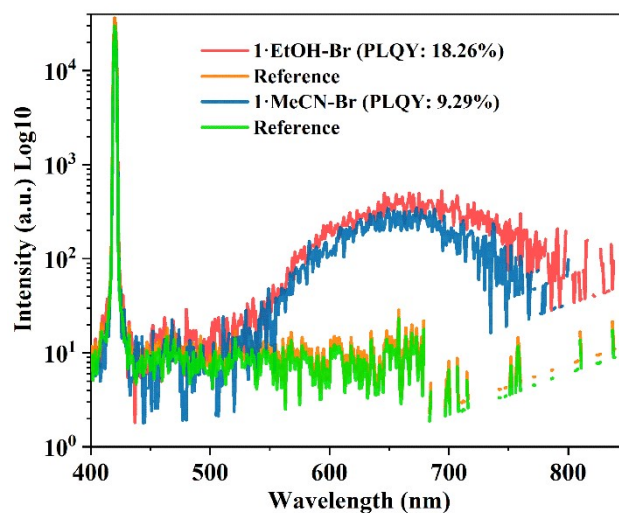

**Figure S6.** PLQY of 1·EtOH-Br and 1·MeCN-Br.

**Table S3.** The fitting parameters in the function based on the time-resolved PL spectra data of 1·EtOH-Br and 1·MeCN-Br.

|               | 1·EtOH-Br                                       | 1·MeCN-Br                                |
|---------------|-------------------------------------------------|------------------------------------------|
| Function      | $I = A_1 \exp(-t/T_1) + A_2 \exp(-t/T_2) + y_0$ |                                          |
| $A_1$         | $0.88356 \pm 0.01532$                           | $0.90798 \pm 0.06392$                    |
| $A_2$         | $0.02505 \pm 0.0153$                            | $0.11026 \pm 0.06443$                    |
| $T_1$         | $0.41182 \pm 0.00486$                           | $0.2398 \pm 0.00715$                     |
| $T_2$         | $1.18908 \pm 0.45274$                           | $0.46035 \pm 0.10426$                    |
| $y_0$         | $6.08584\text{E-}4 \pm 6060066\text{E-}4$       | $4.91358\text{E-}4 \pm 6.1821\text{E-}4$ |
| Adj. R Square | 0.99778                                         | 0.99804                                  |

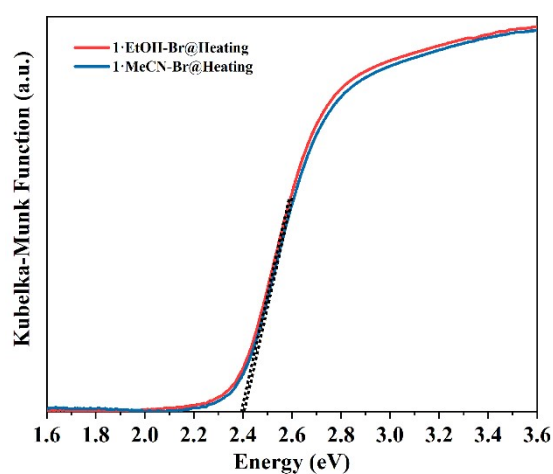

**Figure S7.** UV-vis spectra of 1-Br from heating 1·EtOH-Br and 1·MeCN-Br, respectively.

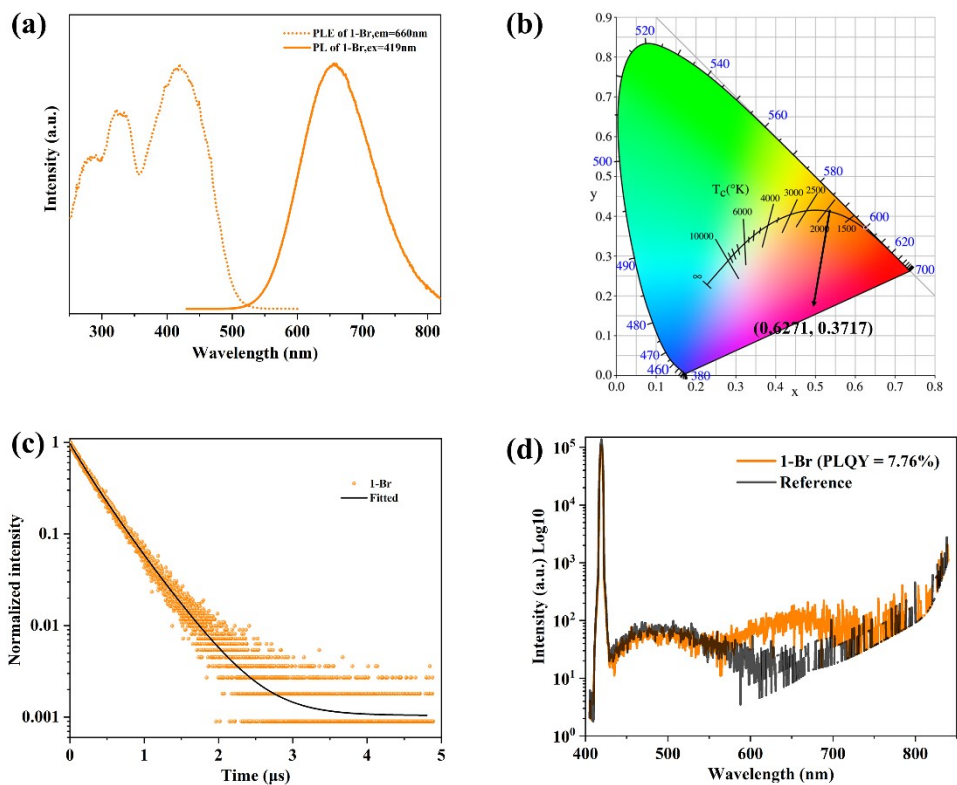

**Figure S8.** Steady-state PLE and PL spectra of **1-Br** (emission peak at 660 nm) under 419 nm excitation at RT (a). The CIE chromaticity coordinate of **1-Br** (b). Time-resolved PL decay curves of **1-Br** at RT (c). PLQY of **1-Br** (d).

**Table S4.** The fitting parameters in the function based on the time-resolved PL spectra data of **1-Br**.

|                      | <b>1-Br</b>            |
|----------------------|------------------------|
| Function             |                        |
| $A_1$                | $0.37742 \pm 0.0753$   |
| $A_2$                | $0.59393 \pm 0.0759$   |
| $T_1$                | $0.23815 \pm 0.01537$  |
| $T_2$                | $0.41233 \pm 0.01364$  |
| $y_0$                | $0.00104 \pm 1.836E-4$ |
| Adj. <i>R</i> Square | 0.99782                |

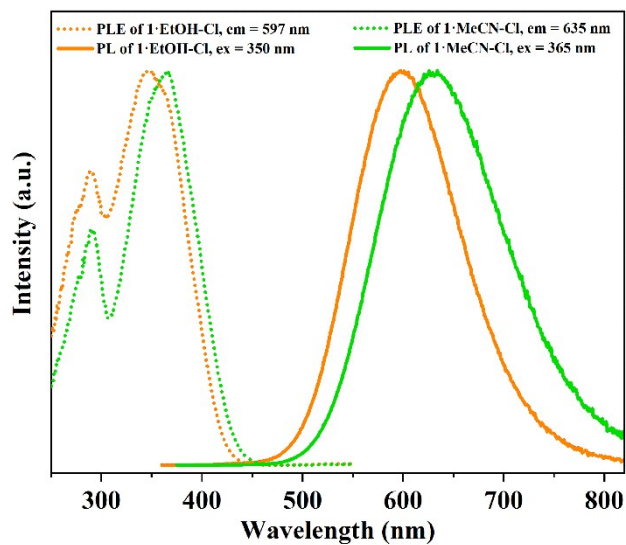

**Figure S9.** The steady-state PLE and PL spectra of **1·EtOH-Cl** (emission peak at 597 nm) and **1·MeCN-Cl** (emission peak at 634 nm) under excitation of 350 and 365 nm at RT, respectively.

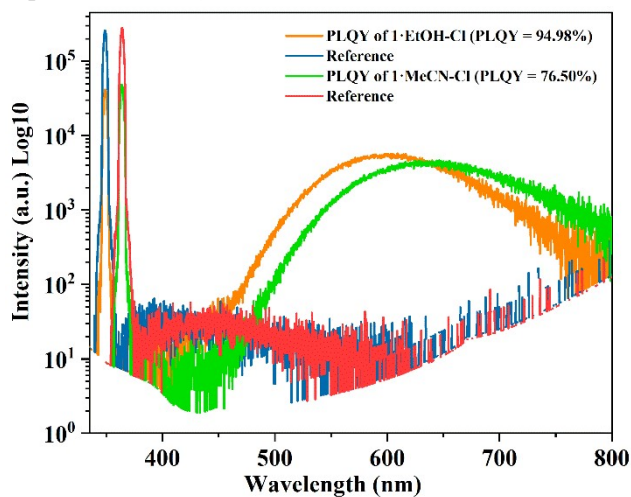

**Figure S10.** PLQY of **1·EtOH-Cl** and **1·MeCN-Cl**.

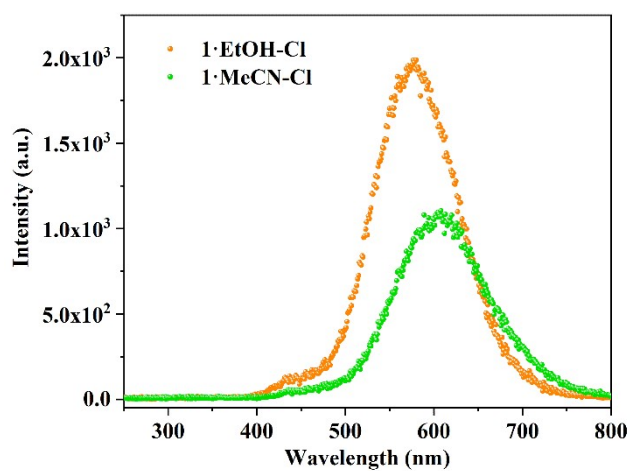

**Figure S11.** The XEL spectra of **1·EtOH-Cl** and **1·MeCN-Cl**.



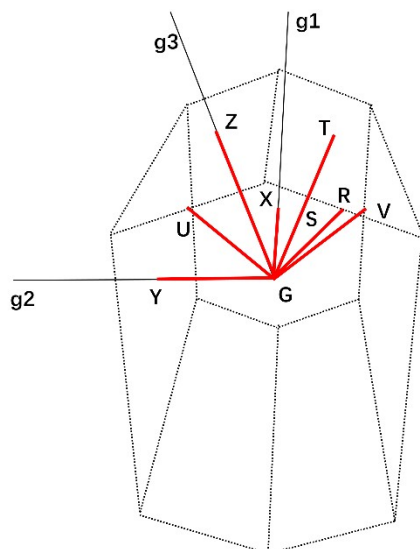

**Figure S12.** The first Brillouin zone with high symmetry points of **1·MeCN-Br**.

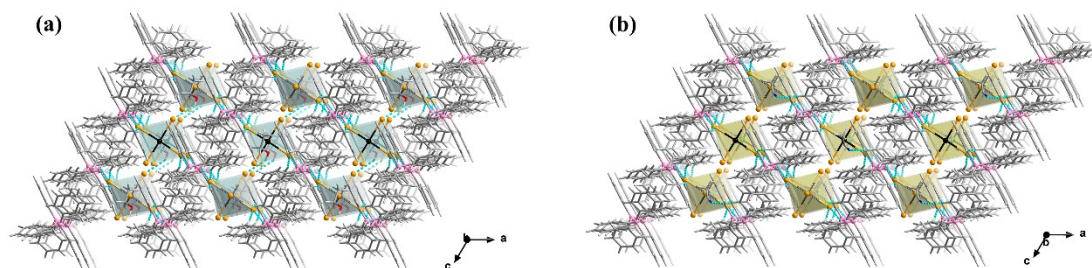

**Figure S13.** Diagrams of supramolecular structures of **1·EtOH-Br** (a) and **1·MeCN-Br** (b). Black ball, Sb; light orange ball, Br; blue ball, N; red ball, O; dark gray ball, C; light gray ball, H.

**Table S5.** Hydrogen bonds for [EtPPh<sub>3</sub>]<sub>2</sub>[SbBr<sub>5</sub>]·EtOH (**1·EtOH-Br**) at 293 K and [EtPPh<sub>3</sub>]<sub>2</sub>[SbBr<sub>5</sub>]·MeCN (**1·MeCN-Br**) at 295 K.

| D-H···A                                                                                                                                                              | d(D-H) | d(H···A) | d(D···A)  | <(DHA) |
|----------------------------------------------------------------------------------------------------------------------------------------------------------------------|--------|----------|-----------|--------|
| <b>1·EtOH-Br</b>                                                                                                                                                     |        |          |           |        |
| C(2)-H(2)···Br(2)#2                                                                                                                                                  | 0.93   | 3.03     | 3.929(5)  | 163.1  |
| C(18)-H(18)···Br(2)#3                                                                                                                                                | 0.93   | 2.97     | 3.876(5)  | 163.7  |
| C(19)-H(19A)···Br(2)#2                                                                                                                                               | 0.97   | 2.96     | 3.786(4)  | 144.1  |
| O(1 <sup>a</sup> )-H(1A <sup>a</sup> )···Br(3)                                                                                                                       | 0.82   | 2.81     | 3.498(9)  | 143.4  |
| Symmetry transformations used to generate equivalent atoms: #1 -x+1, y, -z+3/2, #2 x, -y+1, z-1/2, #3 -x+3/2, y+1/2, -z+3/2                                          |        |          |           |        |
| <b>1·MeCN-Br</b>                                                                                                                                                     |        |          |           |        |
| C(2)-H(2)···Br(2)#2                                                                                                                                                  | 0.93   | 3.02     | 3.915(4)  | 161.9  |
| C(6)-H(6)···N(1 <sup>a</sup> )#3                                                                                                                                     | 0.93   | 2.63     | 3.191(14) | 119.3  |
| C(18)-H(18)···Br(2)#4                                                                                                                                                | 0.93   | 3.00     | 3.905(4)  | 164.5  |
| C(19)-H(19A)···Br(2)#2                                                                                                                                               | 0.97   | 3.04     | 3.860(4)  | 142.7  |
| C(22 <sup>a</sup> )-H(22B <sup>a</sup> )···Br(1)#4                                                                                                                   | 0.96   | 2.89     | 3.689(16) | 141.5  |
| Symmetry transformations used to generate equivalent atoms: #1 -x+1, y, -z+3/2, #2 x+1/2, y-1/2, z, #3 -x+3/2, -y+3/2, -z+1, #4 -x+1, -y+1, -z+1, #5 -x+1, y, -z+1/2 |        |          |           |        |

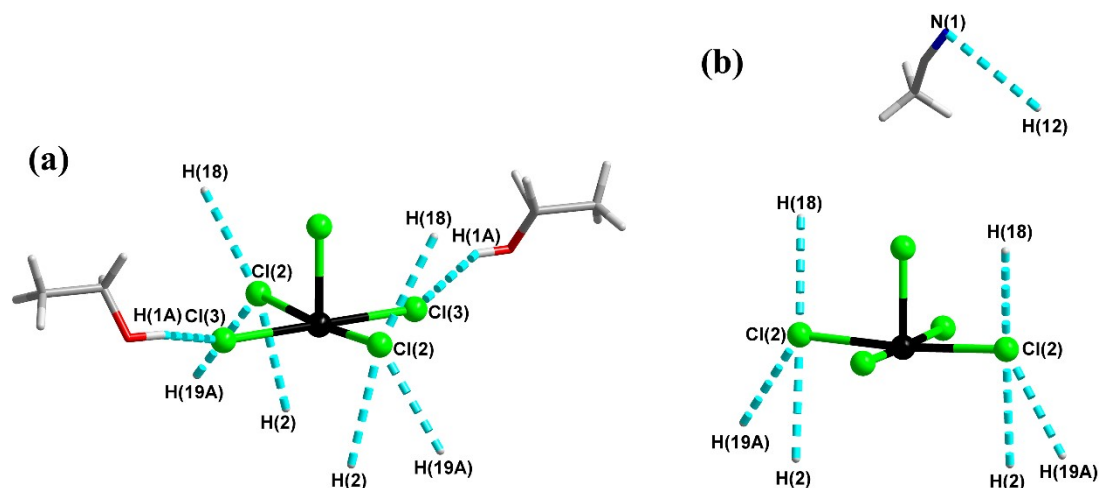

**Figure S14.** Hydrogen bonds of **1·EtOH-Cl** (a) and **1·MeCN-Cl** (b). Black ball, Sb; green ball, Cl; blue ball, N; red ball, O; dark gray ball, C; light gray ball, H. Turquoise dotted lines represent hydrogen bonds.

**Table S6.** Hydrogen bonds for **1·EtOH-Cl** at 293 K and **1·MeCN-Cl** at 295 K.

| D-H···A                                                                                                                                  | d(D-H) | d(H···A) | d(D···A)  | <(DHA) |
|------------------------------------------------------------------------------------------------------------------------------------------|--------|----------|-----------|--------|
| <b>1·EtOH-Cl</b>                                                                                                                         |        |          |           |        |
| C(2)-H(2)···Cl(2)#2                                                                                                                      | 0.93   | 2.89     | 3.789(4)  | 162.7  |
| C(18)-H(18)···Cl(2)#3                                                                                                                    | 0.93   | 2.83     | 3.729(4)  | 162.2  |
| C(19)-H(19A)···Cl(2)#2                                                                                                                   | 0.97   | 2.85     | 3.670(4)  | 142.2  |
| O(1 <sup>a</sup> )-H(1A <sup>a</sup> )···Cl(3)                                                                                           | 0.85   | 2.71     | 3.440(8)  | 144.5  |
| Symmetry transformations used to generate equivalent atoms: #1 -x+1,-y+1,-z, #2 -x+2,-y+1,-z+1                                           |        |          |           |        |
| <b>1·MeCN-Cl</b>                                                                                                                         |        |          |           |        |
| C(2)-H(2)···Cl(2)#2                                                                                                                      | 0.93   | 2.90     | 3.803(3)  | 163.1  |
| C(6)-H(6)···N(1 <sup>a</sup> )#3                                                                                                         | 0.93   | 2.67     | 3.190(13) | 116.2  |
| C(18)-H(18)···Cl(2)#4                                                                                                                    | 0.93   | 2.86     | 3.761(3)  | 163.7  |
| C(19)-H(19A)···Cl(2)#2                                                                                                                   | 0.97   | 2.93     | 3.737(3)  | 141.4  |
| Symmetry transformations used to generate equivalent atoms: #1 -x+1,y,-z+3/2, #2 x+1/2,y-1/2,z, #3 -x+3/2,-y+3/2,-z+1, #4 -x+1,-y+1,-z+1 |        |          |           |        |

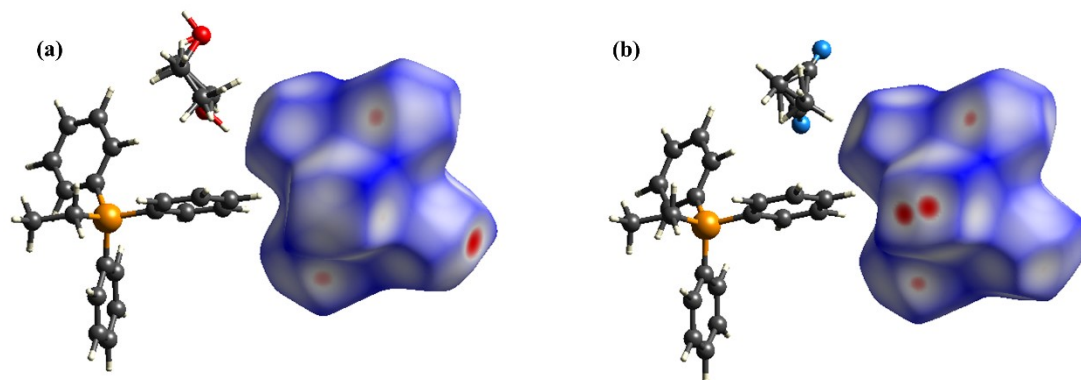

**Figure S15.** The Hirshfeld  $d_{\text{norm}}$  surfaces of inorganic part with all interactions for **1·EtOH-Br** (a)

and **1·MeCN-Br** (b). The highlights in red represent closer distances and stronger interactions while white and blue highlights refer to longer distances and weak interactions.

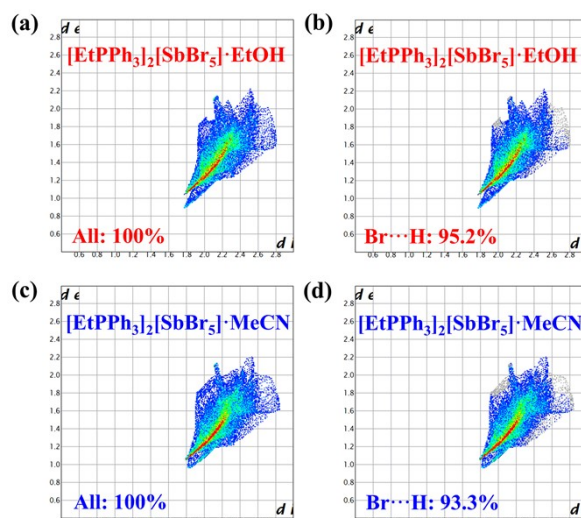

**Figure S16.** The 2D fingerprint plots for **1·EtOH-Br** and **1·MeCN-Br**. All weak interactions for **1·EtOH-Br** (a) and **1·MeCN-Br** (c) are 100%. The contribution of Br...H hydrogen bonds is 95.2% and 93.3% for **1·EtOH-Br** (b) and **1·MeCN-Br** (d), respectively.

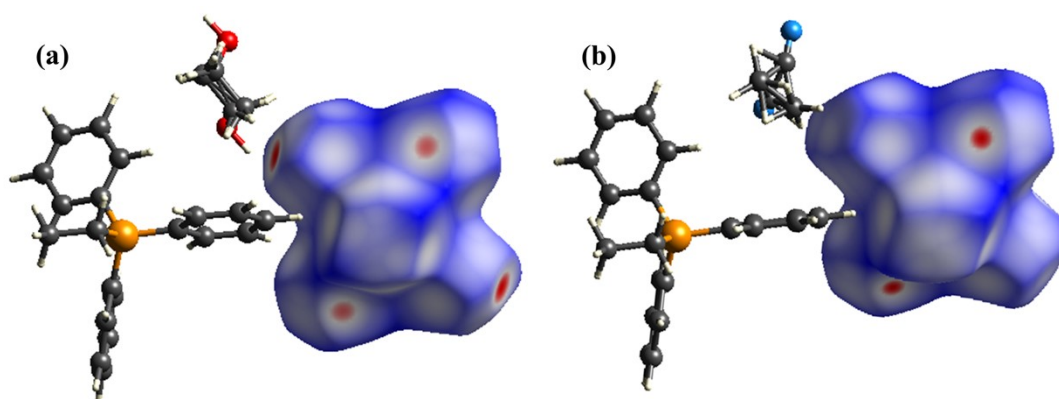

**Figure S17.** The Hirshfeld  $d_{\text{norm}}$  surfaces of inorganic part with all interactions for **1·EtOH-Cl** (a) and **1·MeCN-Cl** (b). The highlights in red represent closer distances and stronger interactions while white and blue highlights refer to longer distances and weak interactions.

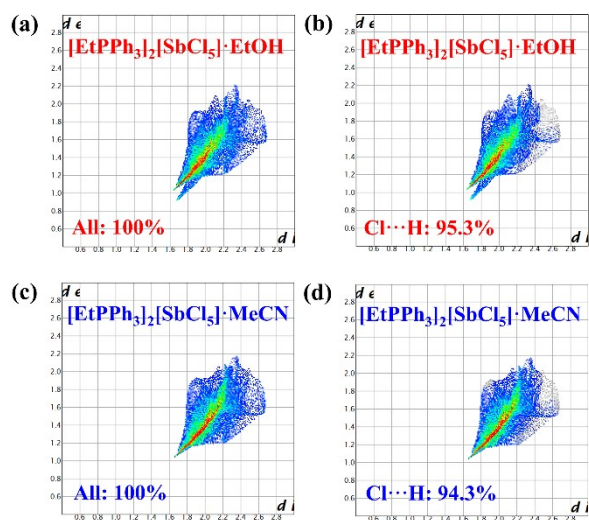

**Figure S18.** The 2D fingerprint plots for  $1 \cdot \text{EtOH}-\text{Cl}$  and  $1 \cdot \text{MeCN}-\text{Cl}$ . All weak interactions for  $1 \cdot \text{EtOH}-\text{Cl}$  (a) and  $1 \cdot \text{MeCN}-\text{Cl}$  (c) are 100%. The contribution of  $\text{Cl} \cdots \text{H}$  hydrogen bonds is 95.3% and 94.3% for  $1 \cdot \text{EtOH}-\text{Cl}$  (b) and  $1 \cdot \text{MeCN}-\text{Cl}$  (d), respectively.
